# Supplementary material for: Nonresonant chemical mechanism in surface-enhanced Raman scattering of pyridine on M@Au12clusters
Source: Royal Society of Chemistry journal article supplement (doi:10.1039/c5nr07246h), 2016-01-01
Supplement: c5nr07246h1.pdf [file c5nr07246h1.pdf]

## Supporting Information

Supporting Information for the paper entitled “Nonresonant Chemical Mechanism in Surface-Enhanced Raman Scattering of Pyridine on  $M@Au_{12}$  Clusters” by Lei Chen, Yang Gao, Y. K. Cheng, Haichao Li, Zhigang Wang, Zhengqiang Li, and Rui-Qin Zhang.

1. Part 1: The calculations of the HOMO-LUMO gap for neutral metal clusters ( $Cr@Au_{12}$ ,  $Mo@Au_{12}$  and  $W@Au_{12}$ ), metal clusters carrying one unit of positive charge ( $Mn@Au^{+12}$ ,  $Tc@Au^{+12}$  and  $Re@Au^{+12}$ ), and metal clusters carrying one unit of negative charge ( $V@Au^{-12}$ ,  $Nb@Au^{-12}$  and  $Ta@Au^{-12}$ ).
2. Part 2: The DOS spectra for neutral metal clusters ( $Cr@Au_{12}$ ,  $Mo@Au_{12}$  and  $W@Au_{12}$ ), metal clusters carrying one unit of positive charge ( $Mn@Au^{+12}$ ,  $Tc@Au^{+12}$  and  $Re@Au^{+12}$ ), and metal clusters carrying one unit of negative charge ( $V@Au^{-12}$ ,  $Nb@Au^{-12}$  and  $Ta@Au^{-12}$ ).
3. Part 3: The Au-N vibrational frequencies of pyridine on different charged metal clusters without scale factor at the BP86/6-311+G(d, p) (C, N, H) /ECP-Lanl2DZ (metal atoms) level
4. Part 4: Cartesian coordinates (in Å) of pyridine on metal clusters ( $Cr@Au_{12}$ ,  $Mo@Au_{12}$ ,  $W@Au_{12}$ ,  $Mn@Au^{+12}$ ,  $Tc@Au^{+12}$ ,  $Re@Au^{+12}$ ,  $V@Au^{-12}$ ,  $Nb@Au^{-12}$  and  $Ta@Au^{-12}$ ) obtained using BP86.

## Part 1

Gold and doped gold clusters have attracted increasing research interest, primarily prompted by the discovery of their unique properties in terms of surface analysis, biological and chemical sensors, biomedical detection, and so on. The chemistry of gold is dominated by its strong relativistic effects and the so-called aurophilic attraction, which can lead to highly unusual structures for gold clusters and compounds compared to those for copper and silver. Despite the fact that the bare 13-atom gold cluster anion has been shown not to possess a high-symmetry icosahedral structure, a series of  $M@Au_{12}$  ( $Ta^-$ ,  $W^-$ ,  $Re^+$ ) clusters have been reported theoretically to form highly stable gold clusters containing an icosahedral  $Au_{12}$  cage and a central heteroatom. Shortly afterward, Wang and colleagues successfully produced some of these  $M@Au_{12}$  ( $W$ ,  $Mo$ ,  $V^-$ ,  $Nb^-$ ,  $Ta^-$ ) clusters experimentally, revealing a the closed-shell electronic structure through the observation of a large energy gap in the PES spectra. However, the positively charged  $M@Au_{12}$  ( $M = Mn^+$ ,  $Tc^+$ ,  $Re^+$ ) means that it cannot be characterized experimentally using ultraviolet PES due to its very high electron binding energy. We adopted nine metal clusters with different core atoms, including neutral metal clusters ( $Cr@Au_{12}$ ,  $Mo@Au_{12}$  and  $W@Au_{12}$ ), metal clusters carrying one unit of positive charge ( $Mn@Au^+_{12}$ ,  $Tc@Au^+_{12}$  and  $Re@Au^+_{12}$ ), and metal clusters carrying one unit of negative charge ( $V@Au^-_{12}$ ,  $Nb@Au^-_{12}$  and  $Ta@Au^-_{12}$ ). The cluster model was a series of icosahedral  $Au_{12}$  gold nanocages containing a central heteroatom. All calculations were performed using DFT methods implemented with the Gaussian09 package. The geometric optimizations and vibrational analysis of all the clusters was carried out using the Becke-Perdew (BP86) functional, which has been shown to provide an adequate description of the interaction of transition metal-organic molecule complexes and yielded harmonic frequencies close to the experimental results without the need for scaling factors. All the metal atoms were described by the basis function LANL2DZ for the valence electrons and internal shells. Vibrational frequency analysis was performed on the basis of the optimized geometries and showed that all the electronic ground states were stable.

**Table S1.** The HOMO-LUMO gaps for the  $M@Au_{12}$  ( $M=V^-$ ,  $Nb^-$ ,  $Ta^-$ ,  $Cr$ ,  $Mo$ ,  $W$ ,  $Mn^+$ ,  $Tc^+$ ,  $Re^+$ ) bare metal clusters.

|         |                | HOMO   | LUMO   | Band gap | Exp     |
|---------|----------------|--------|--------|----------|---------|
| Anion   | $V@Au^-_{12}$  | -2.114 | -0.866 | 1.25     | 1.29[1] |
|         | $Nb@Au^-_{12}$ | -2.193 | -0.298 | 1.89     | 1.26[1] |
|         | $Ta@Au^-_{12}$ | -2.193 | -0.323 | 1.87     | 1.29[1] |
| Neutral | $Cr@Au_{12}$   | -5.553 | -4.456 | 1.10     |         |
|         | $Mo@Au_{12}$   | -5.607 | -4.028 | 1.58     | 1.48[2] |
|         | $W@Au_{12}$    | -5.610 | -3.811 | 1.80     | 1.68[2] |
| Cation  | $Mn@Au^+_{12}$ | -9.106 | -8.026 | 1.08     |         |
|         | $Tc@Au^+_{12}$ | -9.164 | -7.689 | 1.48     |         |
|         | $Re@Au^+_{12}$ | -9.160 | -7.538 | 1.62     |         |

From Table S1, the band gap analysis shows that all the metal clusters exhibited a large gap from 1.10 eV to 1.90 eV, and the theoretical prediction of the band gaps of  $V@Au^-_{12}$ ,  $Mo@Au_{12}$ , and  $W@Au_{12}$  agree well with experimental observations [1, 2]. Although our calculation of the  $Nb@Au^-_{12}$  and  $Ta@Au^-_{12}$  clusters are about 0.6 eV higher than found by PES observation, these results are consistent with previous DFT predictions at the PW91/TZ2P/ZORA level from Wang and colleagues [1].

## Part 2

The DOS spectra of the bare metal clusters  $M@Au_{12}$  ( $M=V^-$ ,  $Nb^-$ ,  $Ta^-$ ,  $Cr$ ,  $Mo$ ,  $W$ ,  $Mn^+$ ,  $Tc^+$ ,  $Re^+$ ) clearly show that the occupied molecular orbitals of the neutral clusters are distributed in the range -10 eV to -7 eV. However, in comparison, the occupied molecular orbitals of the positively charged clusters shift to a lower energy region due to the loss of an electron in the center of the cluster, making the electron density more compact than that of the neutral clusters. This effect is combined with the shift in the occupied molecular orbitals to a lower energy region, from -14 eV to -8 eV. For the negatively charged clusters, the electron density is looser than that of the neutral adsorption systems due to the reception of an electron in the center of the cluster, which results in the occupied molecular orbitals shifting to a higher energy region (from -6 eV to -2 eV).

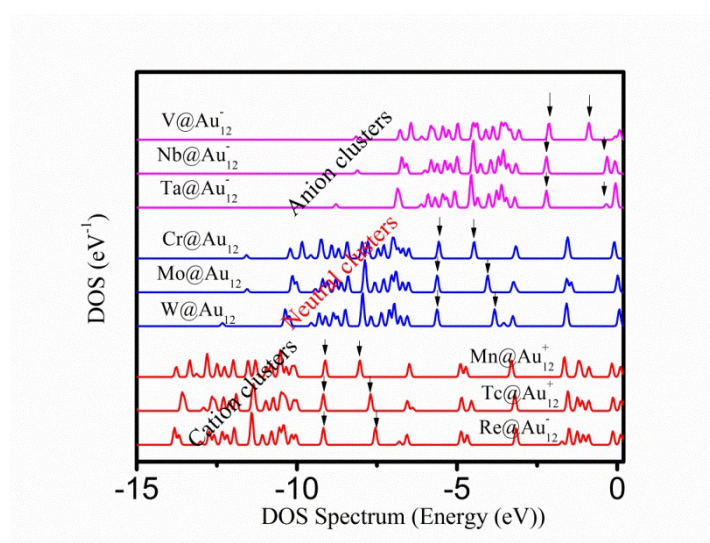

**Figure S1.** The DOS graphs of  $M@Au_{12}$  ( $M=V^-$ ,  $Nb^-$ ,  $Ta^-$ ,  $Cr$ ,  $Mo$ ,  $W$ ,  $Mn^+$ ,  $Tc^+$ ,  $Re^+$ ). The arrows represent the positions of the HOMO and LUMO.

## Part 3

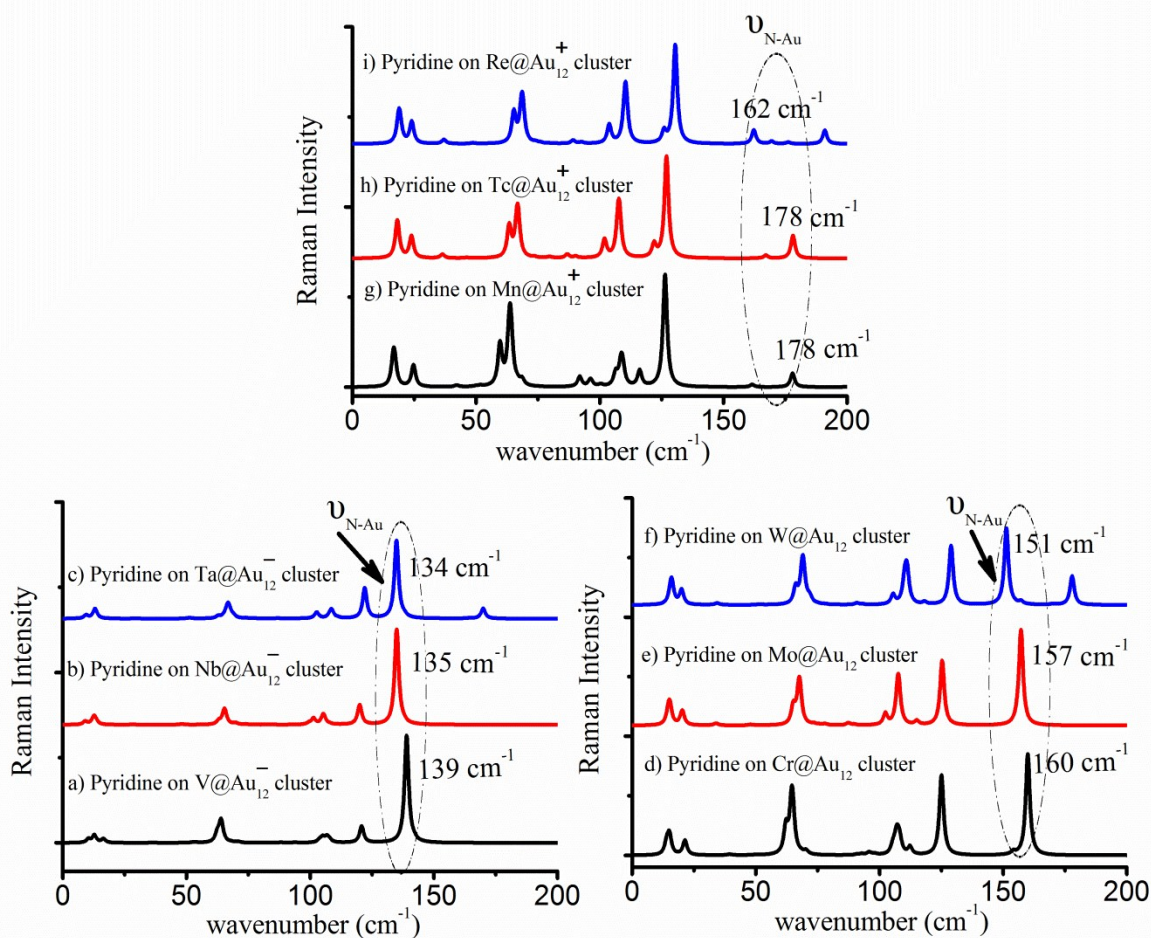

Figure S2. The Au-N vibrational frequencies of pyridine on different charged metal clusters without scale factor at the BP86/6-311+G(d, p) (C, N, H)/ECP-Lanl2DZ (metal atoms) level

Our calculation indicates that the N-Au vibrational frequencies distribute from 134 to 178  $\text{cm}^{-1}$  when pyridine molecules interact with different charged metal clusters, and the Raman spectra of pyridine on cation clusters, neutral clusters and anion clusters are listed in Figure S3 in the range of 0-200  $\text{cm}^{-1}$ . It is obvious that the our calculated values are smaller than the experimental value 260  $\text{cm}^{-1}$  of pyridine adsorbed on gold surface (J. Chem. Soc., Faraday Trans. 2 1979, 75, 790), but these results are in agreement with the frequencies of pyridine on  $\text{Au}_2$  cluster with the value of 137  $\text{cm}^{-1}$  (J. Chem. Phys., 2003, 118, 4073-4085). This is due to the DFT method can give more accurate prediction of high frequencies of vibrational modes compared to the low frequencies. We note that the N-Au vibrational frequencies of pyridine on cation clusters vary in 162-178  $\text{cm}^{-1}$ , which are obviously larger than that of pyridine on neutral and anion metal clusters. This phenomenon can be ascribed to the strong Au-H bonding interaction in complexes of pyridine on cation clusters.

## Part 4

Cartesian coordinates (in Å) of pyridine on metal clusters (Cr@Au<sub>12</sub>, Mo@Au<sub>12</sub>, W@Au<sub>12</sub>, Mn@Au<sup>+</sup> 12, Tc@Au<sup>+</sup> 12, Re@Au<sup>+</sup> 12, V@Au<sup>-</sup> 12, Nb@Au<sup>-</sup> 12 and Ta@Au<sup>-</sup> 12) obtained using BP86.

| V@Au <sup>-</sup> 12 -Py |          |          |          | Nb@Au <sup>-</sup> 12 -Py |          |          |          |
|--------------------------|----------|----------|----------|---------------------------|----------|----------|----------|
| 1 Au                     | 1.50037  | 1.096155 | 2.199894 | 1 Au                      | 1.516717 | 1.115264 | 2.234828 |
| 2 Au                     | -0.96585 | 2.201274 | 1.135348 | 2 Au                      | -0.98562 | 2.233271 | 1.151764 |
| 3 Au                     | -2.48869 | 0.008588 | -0.0054  | 3 Au                      | -2.52842 | 0.008118 | -0.0035  |
| 4 Au                     | -0.9791  | -2.44523 | 0.364778 | 4 Au                      | -0.99885 | -2.48009 | 0.372503 |
| 5 Au                     | 1.49422  | -1.75611 | 1.72516  | 5 Au                      | 1.508083 | -1.78411 | 1.755009 |
| 6 Au                     | -0.97379 | -0.40285 | 2.436034 | 6 Au                      | -0.99188 | -0.40617 | 2.473358 |
| 7 Au                     | 3.035836 | -0.00867 | 0.006006 | 7 Au                      | 3.080014 | -0.00879 | 0.00465  |
| 8 Au                     | 1.500861 | -2.1842  | -1.1289  | 8 Au                      | 1.512821 | -2.22127 | -1.1472  |
| 9 Au                     | -0.96762 | -1.10365 | -2.21271 | 9 Au                      | -0.9886  | -1.11923 | -2.24488 |
| 10 Au                    | -0.96031 | 1.769049 | -1.73593 | 10 Au                     | -0.98055 | 1.792275 | -1.76324 |
| 11 Au                    | 1.514476 | 2.425363 | -0.36256 | 11 Au                     | 1.526284 | 2.465778 | -0.37088 |
| 12 Au                    | 1.506321 | 0.400237 | -2.4217  | 12 Au                     | 1.521321 | 0.404902 | -2.4623  |
| 13 V                     | 0.226537 | 0.000123 | -0.00017 | 13 Nb                     | 0.246342 | -2.2E-05 | 0.000019 |
| 14 C                     | -5.44659 | -1.15858 | -0.00802 | 14 C                      | -5.51492 | -1.15738 | -0.01109 |
| 15 C                     | -5.45441 | 1.163368 | 0.006391 | 15 C                      | -5.52281 | 1.162396 | 0.010058 |
| 16 C                     | -6.85151 | 1.201393 | 0.008558 | 16 C                      | -6.92042 | 1.201529 | 0.011246 |
| 17 C                     | -7.56364 | -0.00461 | 0.001807 | 17 C                      | -7.6322  | -0.00459 | 0.000431 |
| 18 C                     | -6.84341 | -1.20579 | -0.00661 | 18 C                      | -6.91222 | -1.20584 | -0.01088 |
| 19 H                     | -4.83533 | -2.06492 | -0.01423 | 19 H                      | -4.90423 | -2.06436 | -0.01985 |
| 20 H                     | -4.84991 | 2.074133 | 0.01157  | 20 H                      | -4.91891 | 2.073833 | 0.018149 |
| 21 H                     | -7.36622 | 2.16515  | 0.015597 | 21 H                      | -7.43542 | 2.165157 | 0.020511 |
| 22 H                     | -8.65686 | -0.0083  | 0.003204 | 22 H                      | -8.72547 | -0.00831 | 0.000944 |
| 23 H                     | -7.35174 | -2.17293 | -0.01195 | 23 H                      | -7.42076 | -2.17289 | -0.01956 |
| 24 N                     | -4.75909 | 0.004761 | -0.00223 | 24 N                      | -4.82774 | 0.004874 | -0.00117 |

| Ta@Au- 12 -Py |          |          |          | Cr@Au <sub>12</sub> -Py |          |          |          |
|---------------|----------|----------|----------|-------------------------|----------|----------|----------|
| 1 Au          | 1.504295 | -1.11441 | -2.2302  | 1 Au                    | 1.50004  | -1.08874 | -2.1839  |
| 2 Au          | -0.98836 | -2.22859 | -1.1486  | 2 Au                    | -0.96727 | -2.18273 | -1.13077 |
| 3 Au          | -2.52473 | -0.00792 | 0.002874 | 3 Au                    | -2.50922 | -0.00363 | 0.002445 |
| 4 Au          | -1.00131 | 2.474597 | -0.37309 | 4 Au                    | -0.97107 | 2.429883 | -0.36313 |
| 5 Au          | 1.495886 | 1.780296 | -1.75244 | 5 Au                    | 1.499831 | 1.740052 | -1.71143 |
| 6 Au          | -0.99498 | 0.40439  | -2.46748 | 6 Au                    | -0.97254 | 0.403556 | -2.42215 |
| 7 Au          | 3.062884 | 0.008501 | -0.00409 | 7 Au                    | 3.038456 | 0.002931 | -0.00234 |
| 8 Au          | 1.499445 | 2.218169 | 1.144813 | 8 Au                    | 1.503547 | 2.164439 | 1.123532 |
| 9 Au          | -0.99247 | 1.117523 | 2.238568 | 9 Au                    | -0.96965 | 1.097809 | 2.198102 |
| 10 Au         | -0.98446 | -1.78708 | 1.75957  | 10 Au                   | -0.9661  | -1.75482 | 1.723255 |
| 11 Au         | 1.5125   | -2.46209 | 0.371779 | 11 Au                   | 1.508729 | -2.4092  | 0.360706 |
| 12 Au         | 1.508193 | -0.40335 | 2.45828  | 12 Au                   | 1.501427 | -0.4001  | 2.406247 |
| 13 Ta         | 0.242604 | 0.000075 | -6.4E-05 | 13 Cr                   | 0.216539 | -0.0001  | 0.000229 |
| 14 C          | -5.5186  | 1.157157 | 0.011119 | 14 C                    | -5.41013 | 1.163868 | 0.003637 |
| 15 C          | -5.52627 | -1.16224 | -0.01089 | 15 C                    | -5.41368 | -1.16378 | -0.0062  |
| 16 C          | -6.92394 | -1.20171 | -0.01153 | 16 C                    | -6.80956 | -1.20159 | -0.00648 |
| 17 C          | -7.63575 | 0.004354 | 0.000043 | 17 C                    | -7.52206 | 0.003155 | -0.00119 |
| 18 C          | -6.91596 | 1.205685 | 0.011484 | 18 C                    | -6.8059  | 1.205739 | 0.003885 |
| 19 H          | -4.90795 | 2.064206 | 0.019954 | 19 H                    | -4.8065  | 2.073885 | 0.007444 |
| 20 H          | -4.92226 | -2.07364 | -0.01958 | 20 H                    | -4.81316 | -2.07581 | -0.01019 |
| 21 H          | -7.43894 | -2.16534 | -0.02096 | 21 H                    | -7.32224 | -2.16555 | -0.01089 |
| 22 H          | -8.72904 | 0.007968 | 0.000005 | 22 H                    | -8.61465 | 0.004828 | -0.00113 |
| 23 H          | -7.42468 | 2.172638 | 0.020723 | 23 H                    | -7.31576 | 2.171196 | 0.007931 |
| 24 N          | -4.83125 | -0.00485 | 0.000552 | 24 N                    | -4.72216 | -0.00103 | -0.00074 |

| Mo@Au <sub>12</sub> -Py |          |          |          | W@Au <sub>12</sub> -Py |          |          |          |
|-------------------------|----------|----------|----------|------------------------|----------|----------|----------|
| 1 Au                    | 1.513823 | 1.104365 | 2.209872 | 1 Au                   | 1.502701 | 1.104315 | 2.206808 |
| 2 Au                    | -0.98485 | 2.213511 | 1.150287 | 2 Au                   | -0.98851 | 2.210346 | 1.148685 |
| 3 Au                    | -2.54371 | -0.00051 | 0.002848 | 3 Au                   | -2.53853 | -0.0012  | 0.003609 |
| 4 Au                    | -0.98359 | -2.46797 | 0.371942 | 4 Au                   | -0.98608 | -2.46511 | 0.372711 |
| 5 Au                    | 1.515723 | -1.76025 | 1.732343 | 5 Au                   | 1.504956 | -1.7577  | 1.730719 |
| 6 Au                    | -0.98384 | -0.41034 | 2.460631 | 6 Au                   | -0.98692 | -0.40942 | 2.457318 |
| 7 Au                    | 3.072516 | 0.00135  | -0.00317 | 7 Au                   | 3.057373 | 0.002201 | -0.00406 |
| 8 Au                    | 1.514183 | -2.19111 | -1.14025 | 8 Au                   | 1.502427 | -2.18909 | -1.139   |
| 9 Au                    | -0.98851 | -1.11522 | -2.2288  | 9 Au                   | -0.99263 | -1.11456 | -2.22458 |
| 10 Au                   | -0.98777 | 1.778058 | -1.74786 | 10 Au                  | -0.99245 | 1.774525 | -1.74558 |
| 11 Au                   | 1.513988 | 2.442321 | -0.36838 | 11 Au                  | 1.500762 | 2.440631 | -0.36922 |
| 12 Au                   | 1.508104 | 0.406093 | -2.4398  | 12 Au                  | 1.495879 | 0.40542  | -2.43777 |
| 13 Mo                   | 0.223499 | -0.00021 | 0.000109 | 13 W                   | 0.219349 | -0.00026 | 0.000132 |
| 14 C                    | -5.45505 | -1.16351 | -0.00597 | 14 C                   | -5.45469 | -1.1633  | -0.00664 |
| 15 C                    | -5.45498 | 1.162644 | 0.010238 | 15 C                   | -5.4538  | 1.162262 | 0.011619 |
| 16 C                    | -6.85096 | 1.203368 | 0.007686 | 16 C                   | -6.84976 | 1.20372  | 0.008222 |
| 17 C                    | -7.56529 | -0.00029 | -0.0024  | 17 C                   | -7.5646  | 0.000389 | -0.00342 |
| 18 C                    | -6.85104 | -1.20402 | -0.00926 | 18 C                   | -6.8507  | -1.20353 | -0.01083 |
| 19 H                    | -4.85296 | -2.0747  | -0.01146 | 19 H                   | -4.85305 | -2.0748  | -0.01252 |
| 20 H                    | -4.85311 | 2.073943 | 0.017702 | 20 H                   | -4.85171 | 2.073433 | 0.020298 |
| 21 H                    | -7.36244 | 2.167981 | 0.013466 | 21 H                   | -7.36087 | 2.168519 | 0.014548 |
| 22 H                    | -8.65792 | -0.00024 | -0.00479 | 22 H                   | -8.65722 | 0.000842 | -0.00654 |
| 23 H                    | -7.36266 | -2.16854 | -0.01723 | 23 H                   | -7.36264 | -2.16786 | -0.01996 |
| 24 N                    | -4.76476 | -0.00048 | 0.003338 | 24 N                   | -4.76352 | -0.00081 | 0.004053 |

| Mn@Au+ 12-Py |          |          |          | Tc@Au+ 12-Py |          |          |          |
|--------------|----------|----------|----------|--------------|----------|----------|----------|
| 1 Au         | 1.500338 | -1.07386 | -2.17803 | 1 Au         | 1.513783 | 1.092291 | 2.203609 |
| 2 Au         | -0.96713 | -2.16323 | -1.13465 | 2 Au         | -0.98416 | 2.201387 | 1.151277 |
| 3 Au         | -2.53851 | -0.0021  | 0.002117 | 3 Au         | -2.57149 | -0.00062 | 0.001461 |
| 4 Au         | -0.96771 | 2.41703  | -0.35109 | 4 Au         | -0.98174 | -2.45865 | 0.363179 |
| 5 Au         | 1.50193  | 1.737171 | -1.69561 | 5 Au         | 1.517018 | -1.75536 | 1.720211 |
| 6 Au         | -0.97099 | 0.412511 | -2.40735 | 6 Au         | -0.98677 | -0.41572 | 2.449714 |
| 7 Au         | 3.049594 | 0.001115 | -0.00191 | 7 Au         | 3.079936 | 0.001519 | -0.00182 |
| 8 Au         | 1.504821 | 2.147307 | 1.12821  | 8 Au         | 1.517012 | -2.17654 | -1.14039 |
| 9 Au         | -0.96848 | 1.081765 | 2.190794 | 9 Au         | -0.98824 | -1.10481 | -2.22434 |
| 10 Au        | -0.96668 | -1.75037 | 1.706312 | 10 Au        | -0.98721 | 1.775681 | -1.73684 |
| 11 Au        | 1.507208 | -2.399   | 0.348949 | 11 Au        | 1.516792 | 2.430558 | -0.3595  |
| 12 Au        | 1.501623 | -0.40911 | 2.392997 | 12 Au        | 1.510287 | 0.410629 | -2.42688 |
| 13 Mn        | 0.22212  | -0.00012 | 0.000201 | 13 Tc        | 0.216863 | -0.00012 | 0.000017 |
| 14 C         | -5.40036 | 1.168058 | 0.005715 | 14 C         | -5.4337  | -1.16726 | -0.00624 |
| 15 C         | -5.40283 | -1.16653 | -0.00868 | 15 C         | -5.43347 | 1.165914 | 0.009088 |
| 16 C         | -6.79746 | -1.20202 | -0.0093  | 16 C         | -6.82811 | 1.203628 | 0.007966 |
| 17 C         | -7.50944 | 0.00293  | -0.00173 | 17 C         | -7.54162 | -0.0004  | -0.00086 |
| 18 C         | -6.79491 | 1.206381 | 0.00578  | 18 C         | -6.82836 | -1.20459 | -0.00804 |
| 19 H         | -4.80274 | 2.081077 | 0.011738 | 19 H         | -4.83717 | -2.08106 | -0.01209 |
| 20 H         | -4.80735 | -2.08094 | -0.01416 | 20 H         | -4.83694 | 2.079715 | 0.015499 |
| 21 H         | -7.30977 | -2.16578 | -0.01557 | 21 H         | -7.33943 | 2.167888 | 0.013896 |
| 22 H         | -8.60171 | 0.004098 | -0.00182 | 22 H         | -8.63389 | -0.00029 | -0.00207 |
| 23 H         | -7.30527 | 2.171172 | 0.011757 | 23 H         | -7.33994 | -2.16869 | -0.0151  |
| 24 N         | -4.71302 | 0.000048 | -0.00101 | 24 N         | -4.74408 | -0.00077 | 0.001969 |



## Re@Au+ 12-Py

|       |          |          |          |
|-------|----------|----------|----------|
| 1 Au  | 1.506379 | 1.098468 | 2.199416 |
| 2 Au  | -0.99063 | 2.203645 | 1.147356 |
| 3 Au  | -2.57105 | -0.00223 | 0.003256 |
| 4 Au  | -0.98542 | -2.45925 | 0.370448 |
| 5 Au  | 1.510838 | -1.74998 | 1.723385 |
| 6 Au  | -0.99075 | -0.41044 | 2.451741 |
| 7 Au  | 3.070604 | 0.0036   | -0.00407 |
| 8 Au  | 1.508812 | -2.17824 | -1.1358  |
| 9 Au  | -0.9952  | -1.11136 | -2.22073 |
| 10 Au | -0.99544 | 1.770624 | -1.74081 |
| 11 Au | 1.505331 | 2.43043  | -0.36642 |
| 12 Au | 1.499687 | 0.405326 | -2.42829 |
| 13 Re | 0.210616 | -0.00027 | 0.000123 |
| 14 C  | -5.43422 | -1.16746 | -0.00481 |
| 15 C  | -5.4326  | 1.165145 | 0.009118 |
| 16 C  | -6.82719 | 1.203871 | 0.006844 |
| 17 C  | -7.54158 | 0.000379 | -0.00183 |
| 18 C  | -6.82888 | -1.20413 | -0.00768 |
| 19 H  | -4.83834 | -2.08169 | -0.00962 |
| 20 H  | -4.83561 | 2.078646 | 0.015459 |
| 21 H  | -7.33792 | 2.168453 | 0.01177  |
| 22 H  | -8.63385 | 0.001155 | -0.00393 |
| 23 H  | -7.34102 | -2.16795 | -0.01452 |
| 24 N  | -4.74322 | -0.00168 | 0.00323  |

## REFERENCES

- 1 H.-J. Zhai, J. Li, L.-S. Wang, *J. Chem. Phys.* 2004, **121**, 8369-8374.
- 2 L. Xi, B. Kiran, J. Li, H. J. Zhai, L. S. Wang, *Angew. Chem. Int. Ed.* 2002, **41**, 4786-4789.
